# Supplementary material
Source: PubMed Central journal article supplement (PMC3152629)

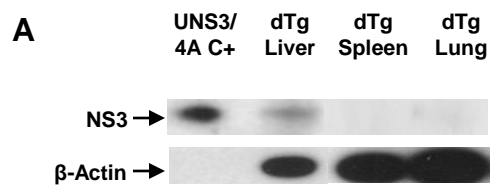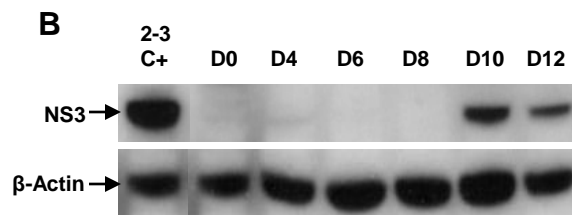

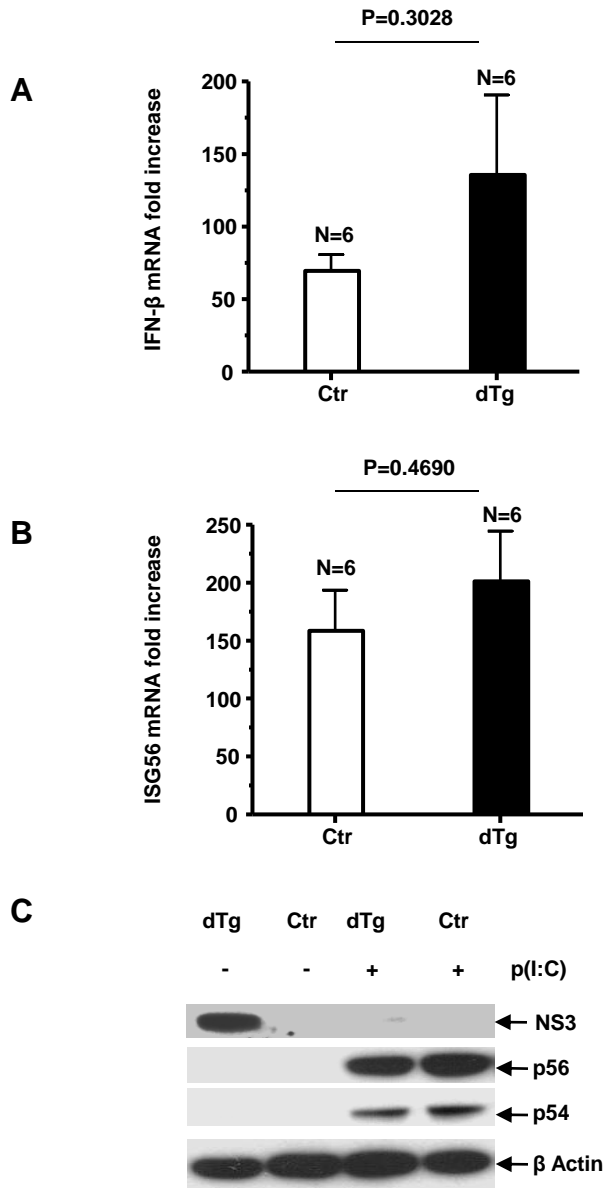

Supplementary Fig. 2 Desai, et al.

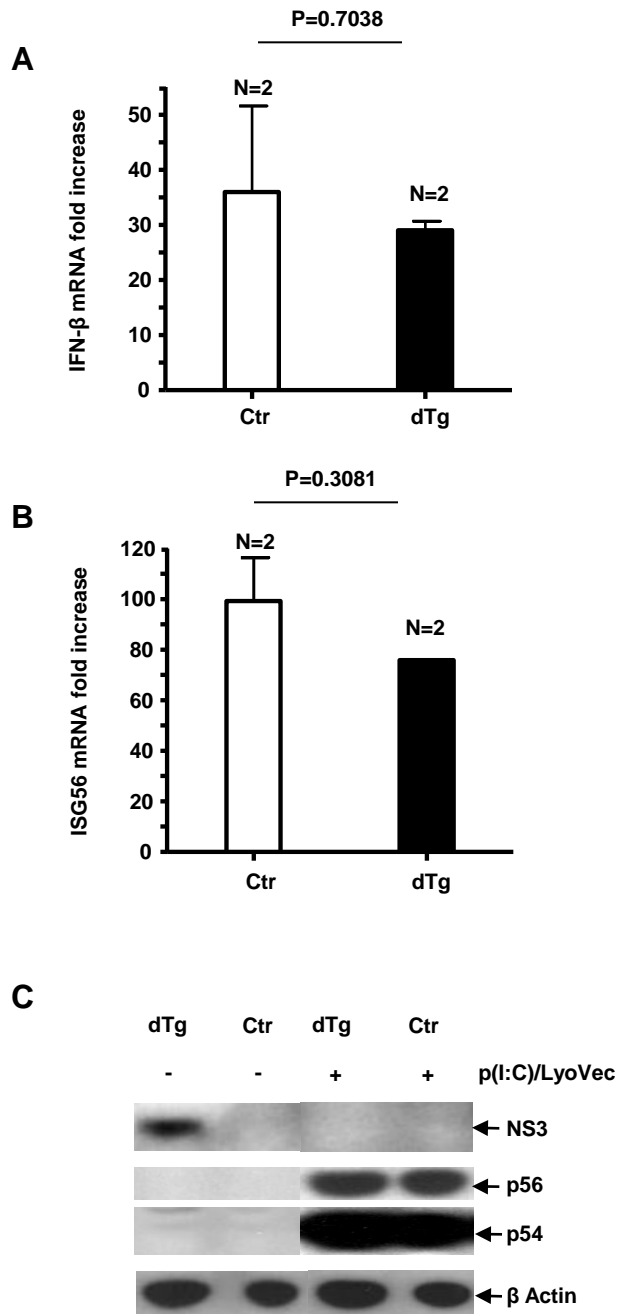

Supplementary Fig. 3 Desai, et al.

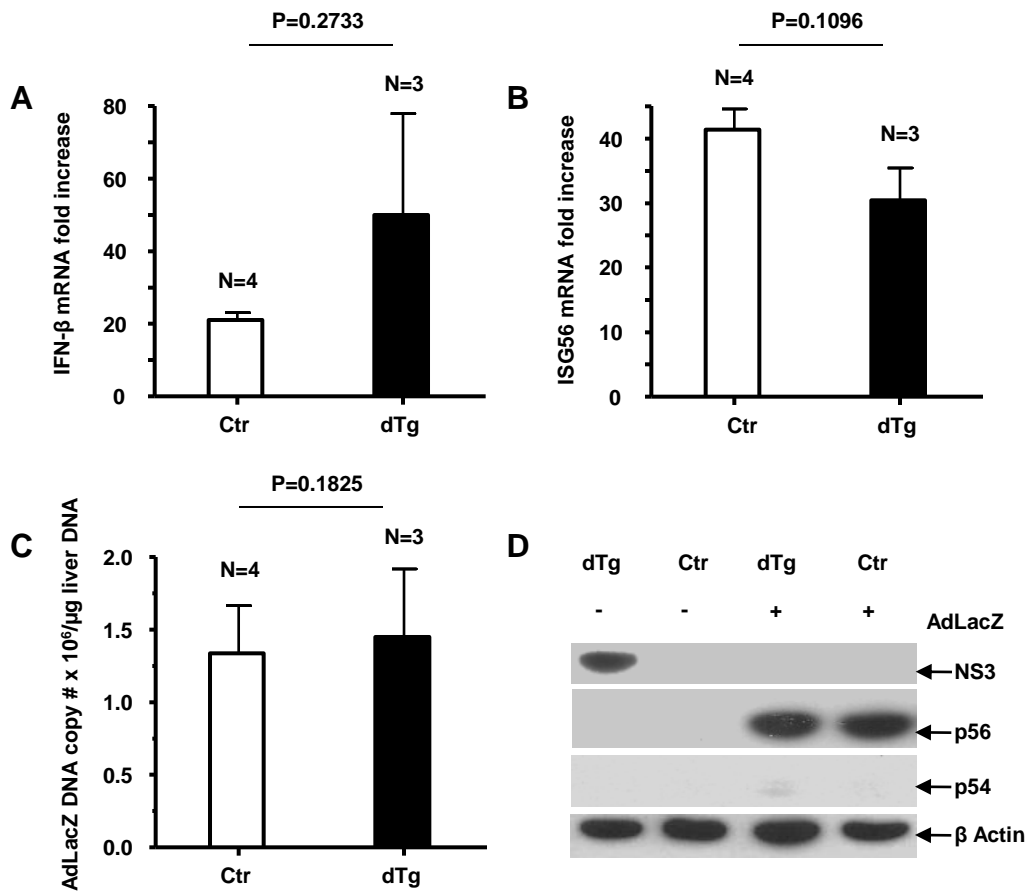

Supplementary Fig. 4 Desai, et al.

**A**

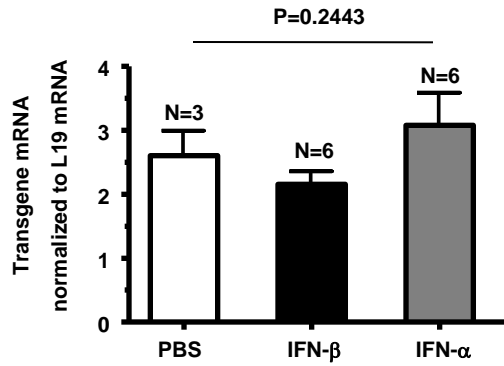

**B**

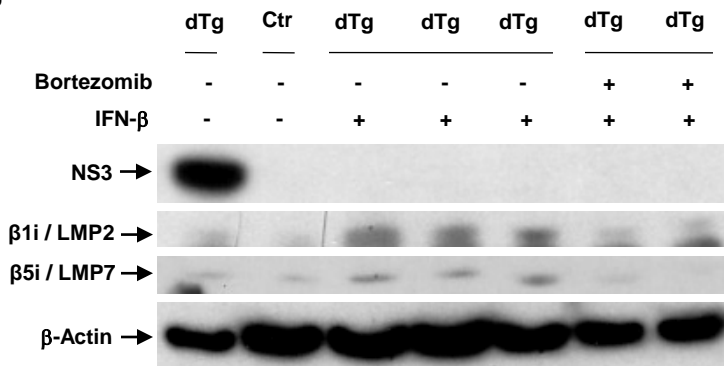

**C**

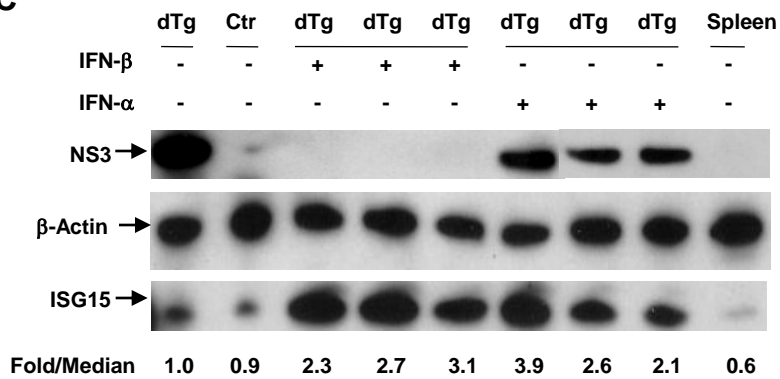

Supplement: NIHMS294630-supplement-02.pdf [file NIHMS294630-supplement-02.pdf]
